# Supplementary material for: Oncolytic effects of the recombinant Newcastle disease virus, rAF-IL12, against colon cancer cells in vitro and in tumor-challenged NCr-Foxn1nu nude mice
Source: PeerJ. 2020 Dec 8;8:e9761. doi: 10.7717/peerj.9761 (PMC7731658; doi:10.7717/peerj.9761)
Supplement: Supplemental Information 2 [file peerj-08-9761-s002.xlsx]

## Sheet: Figure 1
Viral copy number in HT29 cells
			24-H	S.E.M.	48-H	S.E.M.	72-H	S.E.M.
		AF2240-i	10.47	0.005774	10.5	0.05774	10.58	0.01155
		rAF-IL12	11.54	0.008819	11.58	0.06642	11.68	0.03756
		24-H	Control	AF2240-i	rAF-IL12
			0	10.46	11.55
			0	10.48	11.52
			0	10.47	11.54
		48-H	Control	AF2240-i	rAF-IL12
			0	10.4	11.69
			0	10.6	11.46
			0	10.5	11.58
		72-H	Control	AF2240-i	rAF-IL12
			0	10.6	11.74
			0	10.56	11.61
			0	10.58	11.68

## Sheet: Figure 2
MTT assay
		Percentage of cell viability (%)
	Concentration (HA unit)	AF2240-3T3	rAF-IL12-3T3	AF2240-HT29	rAF-IL12-HT29
	512	85	87.9187	36.7	30.5
	256	88.9	91.6268	46	39.7
	128	92.3	94.0191	50	45.6
	64	95.4	97.7871	56	61.2
	32	98.2	98.6842	64.1382	71.8
	16	99.75	99.7	69.6241	76.6
	0	100	100	100	100

## Sheet: Figure 3
Annexin V FITC
		Viable cells	S.E.M.	Early Apoptotic	S.E.M.	Late Apoptotic	S.E.M.
	Negative Control	99.85	0.01856	0.06	0.008819	0	0.01
	AF2240-i	82.46	0.04583	8.34	0.09713	9.08	0.06438
	rAF-IL12	79.31	0.9356	9.03	0.489	11.2	0.2795
	VIABLE CELLS	Control	AF2240-i	rAF-IL12
		99.83	82.55	78.8
		99.84	82.43	81.12
		99.89	82.4	78
	EARLY APOPTOTIC	Control	AF2240-i	rAF-IL12
		0.08	8.15	9.56
		0.06	8.47	8.05
		0.05	8.4	9.47
	LATE APOPTOTIC	Control	AF2240-i	rAF-IL12
		0.03	9.21	11.52
		0	9.04	10.64
		0	9	11.43

## Sheet: Figure 4
Cell Cycle Analysis
		G0 phase	S.E.M.	G1 phase	S.E.M.	S phase	S.E.M.	G2/M phase	S.E.M.
	Negative Control	0.97	0.0809	76.26	0.1852	9.55	0.01155	7.27	0.1105
	AF2240-i	8.08	0.6009	69.71	0.8941	13.18	0.407	7.19	0.3393
	rAF-IL12	11.07	0.5164	68.06	0.5802	12.16	0.2395	7.29	0.08413
	G0	Control	AF2240-i	rAF-IL12
		0.86	8.91	12.09
		1.13	6.91	10.7
		0.93	8.41	10.42
	G1	Control	AF2240-i	rAF-IL12
		76.59	68.29	66.91
		75.95	69.47	68.53
		76.23	71.36	68.75
	S	Control	AF2240-i	rAF-IL12
		9.57	13.18	12.29
		9.55	13.88	12.5
		9.53	12.47	11.7
	G2/M	Control	AF2240-i	rAF-IL12
		7.06	7.87	7.13
		7.43	6.81	7.41
		7.33	6.9	7.34

## Sheet: Figure 5
Tumor weight (gram)
	control	AF2240-i	rAF-IL12
	1.424	0.864	0.46
	1.253	0.825	0.383
	1.29	0.94	0.433
	1.19	0.64	0.334
NEGATIVE CONTROL	Tumour volume mm3
Day	1	2	3	4
0	39.025	44.8	40.39	49.43
7	75	78.58	75.53	81.25
14	268.84	282.44	259.73	311.15
21	681.5	713.36	709.28	729.21
28	1410.5	1622.28	1522	2042.75
AF2240-i	Tumour volume mm3
Day	1	2	3	4
0	29.65	31.43	31.85	34.83
7	62.25	62.87	64.2	67.76
14	108.76	123.93	129.45	137.39
21	267.89	269.5	281.25	318.89
28	480	519.088	558.01	754.4
RAF-IL12	Tumour volume mm3
Day	1	2	3	4
0	26.42	26.78	31.33	31.58
7	44.06	45.17	49.55	50.63
14	82.52	81.35	88.53	91
21	186.54	198.15	207.37	229.47
28	277	294	335.727	379.43

## Sheet: Figure 6
Viral Copy Number
		(in log 10)							tumor
									control	AF2240-i	rAF-IL12
		AF2240-i	S.E.M.	rAF-IL12	S.E.M.				0	8.93	9.32
	Tumor	8.97	0.02309	9.36	0.02309				0	9.01	9.4
	Lung	6.157	0.06064	6.417	0.003333				0	8.97	9.36
	Spleen	6.737	0.003333	5.467	0.2973
									lung
									control	AF2240-i	rAF-IL12
									0	6.26	6.42
									0	6.16	6.41
									0	6.05	6.42
									spleen
									control	AF2240-i	rAF-IL12
									0	6.74	5.98
									0	6.73	4.95
									0	6.74	5.47

## Sheet: Figure 11
SERUM CYTOKINE
	Group	IFN-y	S.E.M.			Group	IL-2	S.E.M.			Group	IL-12	S.E.M.
	Normal	0	0			Normal	0	0			Normal	0	0
	Control	0	0			Control	3.753	0.365			Control	0	0
	AF2240-i	0	0			AF2240-i	15.17	0.1992			AF2240-i	0	0
	rAF-IL12	192.4	11.55			rAF-IL12	21.03	0.2656			rAF-IL12	26.93	4.122
IFN-y	Normal	Control	AF2240-i	rAF-IL12
	0	0	0	192.4
	0	0	0	172.4
	0	0	0	212.4
IL-2	Normal	Control	AF2240-i	rAF-IL12
	0	3.45	15.17	21.03
	0	3.33	15.52	21.49
	0	4.48	14.83	20.57
IL-12	Normal	Control	AF2240-i	rAF-IL12
	0	0	0	26.93
	0	0	0	34.07
	0	0	0	19.79

## Sheet: Figure 12
Nanostring Gene expression analysis (normalised data)
(A) HT29 cells
		Group	FAS	S.E.M.	CASPASE-8	S.E.M.	BID	S.E.M.	BAX	S.E.M.	SMAD3	S.E.M.
		Negative control	1	0	1	0	1	0	1	0	1
		AF2240-i	4.63	0.03608	3.58	0.2001	2.34	0.09403	1.14	0.008647	3.28	0.02427
		rAF-IL12	5.12	0.006083	4.48	0.2803	2.15	0.06261	1.11	0.01537	2.05	0.03811
		FAS	Negative control	AF2240-i	rAF-IL12		CASPASE8	Negative control	AF2240-i	rAF-IL12
			1	4.693	5.121			1	3.837	4.724
			1	4.568	5.133			1	3.706	3.918
			1	4.631	5.112			1	3.182	4.79
		BID	Negative control	AF2240-i	rAF-IL12		BAX	Negative control	AF2240-i	rAF-IL12
			1	2.497	2.114			1	1.148	1.136
			1	2.364	2.056			1	1.156	1.083
			1	2.173	2.266			1	1.127	1.114
		SMAD3	Negative control	AF2240-i	rAF-IL12
			1	3.242	2.055
			1	3.326	1.987
			1	3.281	2.119
(B) HT29 TUMOR
		Group	FAS	S.E.M.	CASPASE-8	S.E.M.	BID	S.E.M.	BAX	S.E.M.	SMAD3	S.E.M.	GRANZYME B	S.E.M.
		Negative control	1	0	1	0	1	0	1	0	1	0	1	0
		AF2240-i	2.11	0.07265	1.08	0.005774	2.79	0.064	1.11	0.04	1.98	0.03464	2.79	0.09735
		rAF-IL12	2.76	0.2138	1.34	0.06984	3.29	0.097	1.74	0.07	4.14	0.2973	3.49	0.1212
		BAX	Negative control	AF2240-i	rAF-IL12		CASPASE8	Negative control	AF2240-i	rAF-IL12
			1	1.18	1.8			1	1.08	1.48
			1	1.04	1.6			1	1.09	1.3
			1	1.11	1.8			1	1.1	1.25
		BID	Negative control	AF2240-i	rAF-IL12		GRANZYME B	Negative control	AF2240-i	rAF-IL12
			1	2.68	3.37			1	2.71	3.28
			1	2.9	3.41			1	2.98	3.7
			1	2.81	3.1			1	2.67	3.49
			Negative control	AF2240-i	rAF-IL12			Negative control	AF2240-i	rAF-IL12
		SMAD3	1	2.04	3.63		FAS	1	2	2.39
			1	1.92	4.66			1	2.25	3.11
			1	1.98	4.14			1	2.1	2.9

## Sheet: Figure 13
Number of apoptotic cells (TUNEL Assay)
	Group	Number of apoptotic cells	S.E.M.
	Negative Control	7.67	0.8819
	Positive Control	64.67	2.728
	AF2240-i	30.33	2.333
	rAF-IL12	60.33	1.453
		Positive Control	Negative Control	AF2240-i	rAF-IL12
		61	6	26	60
		63	8	31	58
		70	9	34	63

## Sheet: Figure 14
Tumor Histopathology
	Group	Number of mitotic cells	S.E.M.
	Control	37.67	2.906
	AF2240-i	25	1.528
	rAF-IL12	18.67	0.8819
		Control	AF2240-i	rAF-IL12
		37	22	19
		33	26	17
		43	27	20

[truncated: 3 more sheets: Table 1, Table 2, Table 3]
